# Supplementary material
Source: PubMed Central journal article supplement (PMC5710301)

## Supplementary Online Content

Leng Y, McEvoy CT, Allen IE, Yaffe K. Association of sleep-disordered breathing with cognitive function and risk of cognitive impairment: a systematic review and meta-analysis. *JAMA Neurol*. Published online August 28, 2017.  
doi:10.1001/jamaneurol.2017.2180

**eFigure.** Flowchart of literature search and inclusion studies

This supplementary material has been provided by the authors to give readers additional information about their work.

**eFigure.** Flowchart of literature search and inclusion studies

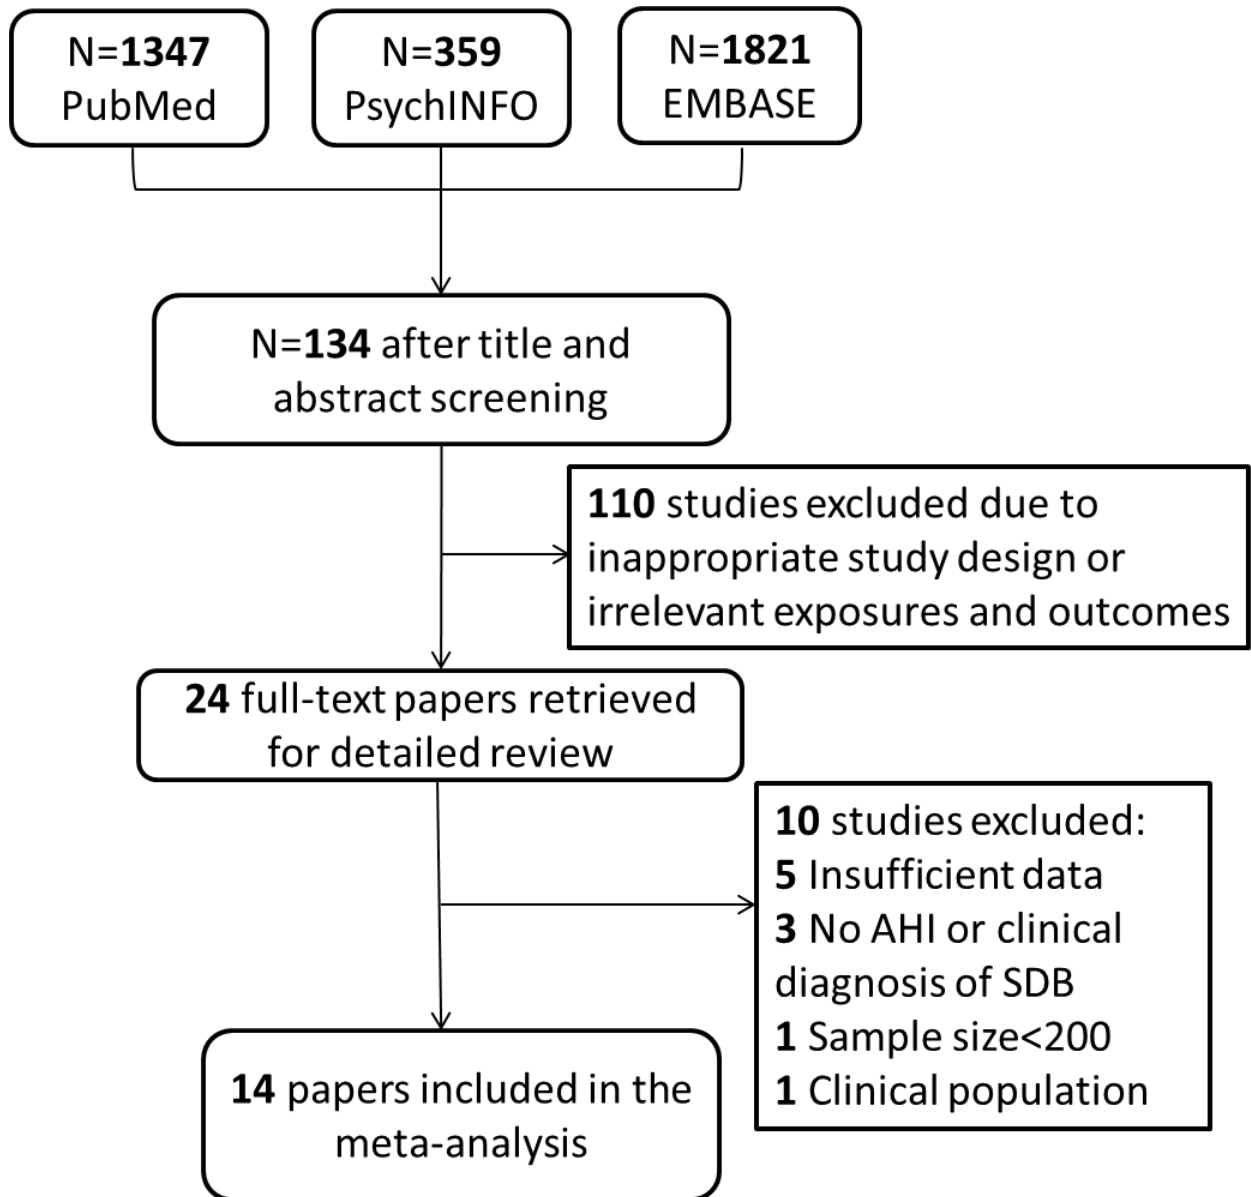

Supplement: jamaneurol-74-1237-s001.pdf [file jamaneurol-74-1237-s001.pdf]
